# Supplementary material for: Aerosol characterization in the Subtropical Eastern North Atlantic region derived from long-term AERONET measurements
Source: Copernicus journal article supplement (doi:10.5194/acp-2022-231), 2022-05-11
Supplement: Supplementary file 1 [file acp-2022-231-supplement.pdf]

# Supplement of "Aerosol characterization in the Subtropical Eastern North Atlantic region derived from long-term AERONET measurements"

Barreto et al.

## S1 Long-Term trends

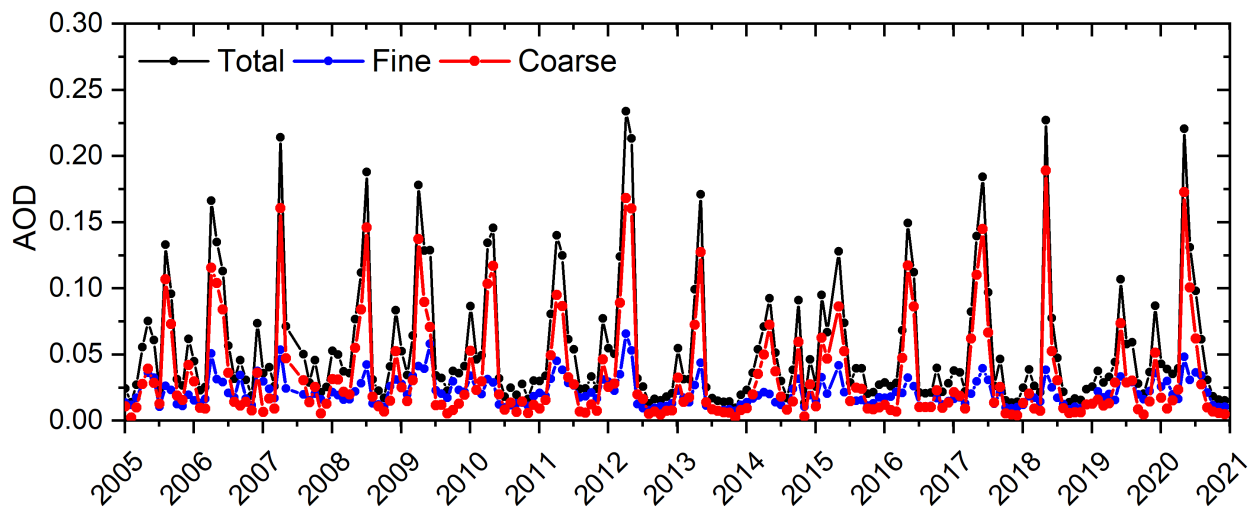

**Figure S1.** Series of monthly mean values of total (black), fine (blue) and coarse-mode AOD (red) at IZO between 2005 and 2021.

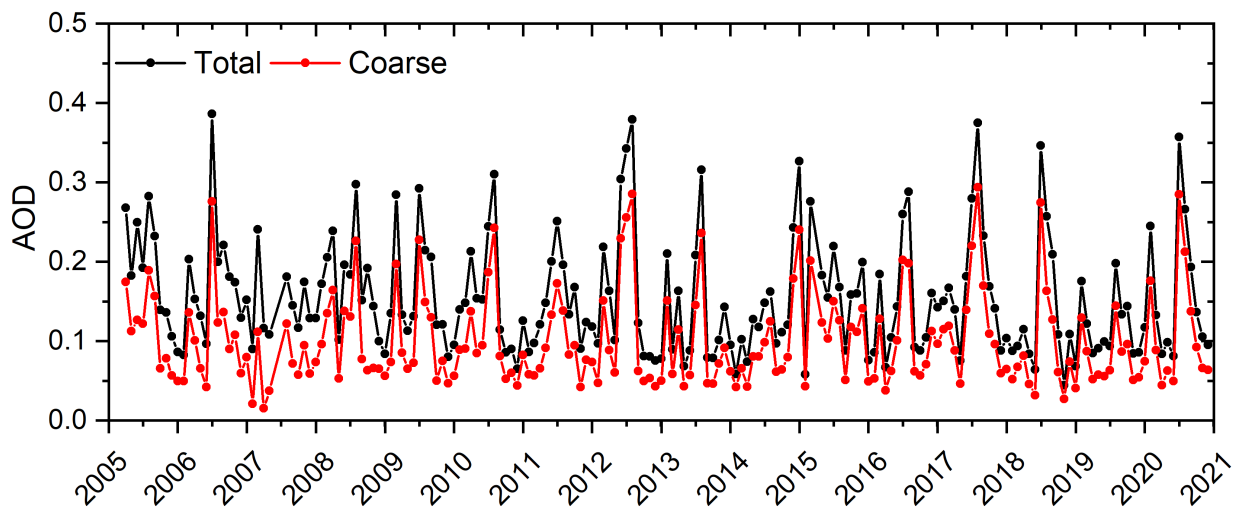

**Figure S2.** Series of monthly mean values of total (black) and coarse-mode AOD (red) at SCO between 2006 and 2021.
